# Supplementary material for: Full-length human GLP-1 receptor structure without orthosteric ligands
Source: PubMed Central journal article supplement (PMC7062719; doi:10.1038/s41467-020-14934-5), 2020-03-09
Supplement: 41467_2020_14934_MOESM1_ESM.pdf [file 41467_2020_14934_MOESM1_ESM.pdf]

## **Supplementary information**

### **Full length human GLP1 receptor structure without orthosteric ligands**

Wu et al.

#### Contents:

Supplementary Tables 1-2

Supplementary Figures 1-6

Supplementary Movies 1-3

**Supplementary Table 1: Data collection and refinement statistics (molecular replacement)**

| GLP-1R-PF-06372222-<br>Fab7F38 <sup>#</sup>          |                                                |
|------------------------------------------------------|------------------------------------------------|
| <b>Data collection</b>                               |                                                |
| Space group                                          | P 2 <sub>1</sub> 2 <sub>1</sub> 2 <sub>1</sub> |
| Cell dimensions                                      |                                                |
| <i>a</i> , <i>b</i> , <i>c</i> (Å)                   | 63.0, 64.7, 322.4                              |
| $\alpha$ , $\beta$ , $\gamma$ (°)                    | 90.0, 90.0, 90.0                               |
| Resolution (Å)                                       | 45.7 - 3.20 (3.37- 3.20)*                      |
| <i>R</i> <sub>sym</sub> or <i>R</i> <sub>merge</sub> | 11.6 (62.6)                                    |
| <i>CC</i> (1/2) (%)                                  | 99.8 (52.6)                                    |
| <i>I</i> / $\sigma$ <i>I</i>                         | 6.5 (1.8)                                      |
| Completeness (%)                                     | 97.8 (96.7)                                    |
| Redundancy                                           | 4.8 (3.9)                                      |
| <b>Refinement</b>                                    |                                                |
| Resolution (Å)                                       | 30.00 - 3.20                                   |
| No. reflections                                      | 21990                                          |
| <i>R</i> <sub>work</sub> / <i>R</i> <sub>free</sub>  | 0.213 / 0.262                                  |
| No. atoms                                            |                                                |
| Protein                                              | 6486                                           |
| Ligand/ion                                           | 37 / 1                                         |
| <i>B</i> -factors (Å <sup>2</sup> )                  |                                                |
| Wilson                                               | 101.7                                          |
| Protein                                              | 136.7                                          |
| Ligand/ion                                           | 154.3 / 175.2                                  |
| R.m.s. deviations                                    |                                                |
| Bond lengths (Å)                                     | 0.010                                          |
| Bond angles (°)                                      | 0.94                                           |

<sup>#</sup>Number of crystals: 21

\*Values in parentheses are for highest-resolution shell.

## Supplementary Table 2: Primers used in the studies

### Primers of 11 mutations

|               |                                                                                 |
|---------------|---------------------------------------------------------------------------------|
| S193C/I196F-F | 5'AGTTTCATCCTCCGCGCGTTGTGTGTGTTCTTTAAGGACGCTGCCCTGAA<br>ATGGATG                 |
| S193C/I196F-R | 3'CATCCATTTCAAGGCAGCGTCCTTAAAGAACACACACAACGCGCGGAGG<br>ATGAAACT                 |
| S225A/M233C-F | 5'CTCTTGAGCTACCAAGATAGTCTCGCGTGCCGTTTGGTTTTCTGCTCTGT<br>CAGTACTGTGTGGCTGCCAACT  |
| S225A/M233C-R | 3'AGTTGGCAGCCACACAGTACTGACAGAGCAGGAAAACCAAACGGCACG<br>CGAGACTATCTTGGTAGCTCAAGAG |
| S271A-F       | 5'ACAATGGATCTTCCGCCTCTACGTGGCCATTGGTTGGGGCGTCCCCCTGC<br>TCTT                    |
| S271A-R       | 3'AAGAGCAGGGGGACGCCCCAACCAATGGCCACGTAGAGGCGGAAGATC<br>CATTGT                    |
| I317C/G318I-F | 5'CGTCTGCCCATCCTCTTCGCCTGTATCGTGAACCTCTTGATCTTCGT                               |
| I317C/G318I-R | 3'ACGAAGATCAAGAAGTTCACGATACAGGCGAAGAGGATGGGCAGACG                               |
| K346A/C347F-F | 5'AACCTCATGTGCAAGACAGACATCGCATTTAGATTGGCTAAGTCCACCTT<br>GACT                    |
| K346A/C347F-R | 3'AGTCAAGGTGGACTTAGCCAATCTAAATGCGATGTCTGTCTTGCACATGA<br>GGTT                    |
| G361C-F       | 5'TGACTCTGATCCCATTGCTGTGTACGCACGAGGTTATTTTCGCT                                  |
| G361C-R       | 3'AGCGAAAATAACCTCGTGCGTACACAGCAATGGGATCAGAGTCA                                  |
| E387D-F       | 5'TCAGATTCATCAAATTGTTACCGACCTGAGTTTCACTTCGTTCCAGGGA                             |
| E387D-R       | 3'TCCCTGGAACGAAGTGAAACTCAGGTCCGGTGAACAATTTGATGAATCTG<br>A                       |

### Primers of fusion partner insertion

|                                |                                               |
|--------------------------------|-----------------------------------------------|
| Fusion partner<br>Rubredoxin-F | 5'CCTGTACACGCTCTTGGCTTTCATGAAGAAGTATACCTGT    |
| Fusion partner<br>Rubredoxin-R | 3'AGGCGGAAGATCCATTGTTCCCTCCACCTCTTCAAATTGGTCC |

### Primers of GLP-1R mutants in cAMP assay

|         |                                                              |
|---------|--------------------------------------------------------------|
| E127C-F | 5'TGGCGTGATTTGTCTGAGTGCTGCGAATCAAAACGCGGTGAACGTAG            |
| E127C-R | 3'CTACGTTACCGCGTTTTGATTCGCAGCACTCAGACAAATCACGCCA             |
| Q211C-F | 5'GATGTA CTCCACCGCAGCGCAGTGCCATCAGTGGGACGGACTCTTGAG          |
| Q211C-R | 3'CTCAAGAGTCCGTCCCCTGATGGCACTGCGCTGCGGTGGAGTACATC            |
| Q37C-F  | 5'CTCAAGAGTCCGTCCCCTGATGGCACTGCGCTGCGGTGGAGTACATC            |
| Q37C-R  | 3'CTGACGGCGGTATTCCTCCACTTGCAAACGGTCTCCACAGAGAGACA            |
| L379C-F | 5'TGGATGAACATGCCAGGGGAACCTGCAGATTCATCAAATTGTTACCGA<br>GCTG   |
| L379C-R | 3'CAGCTCGGTGAACAATTTGATGAATCTGCAGGTTCCCCTGGCATGTTTCAT<br>CCA |

## Supplementary Figures:

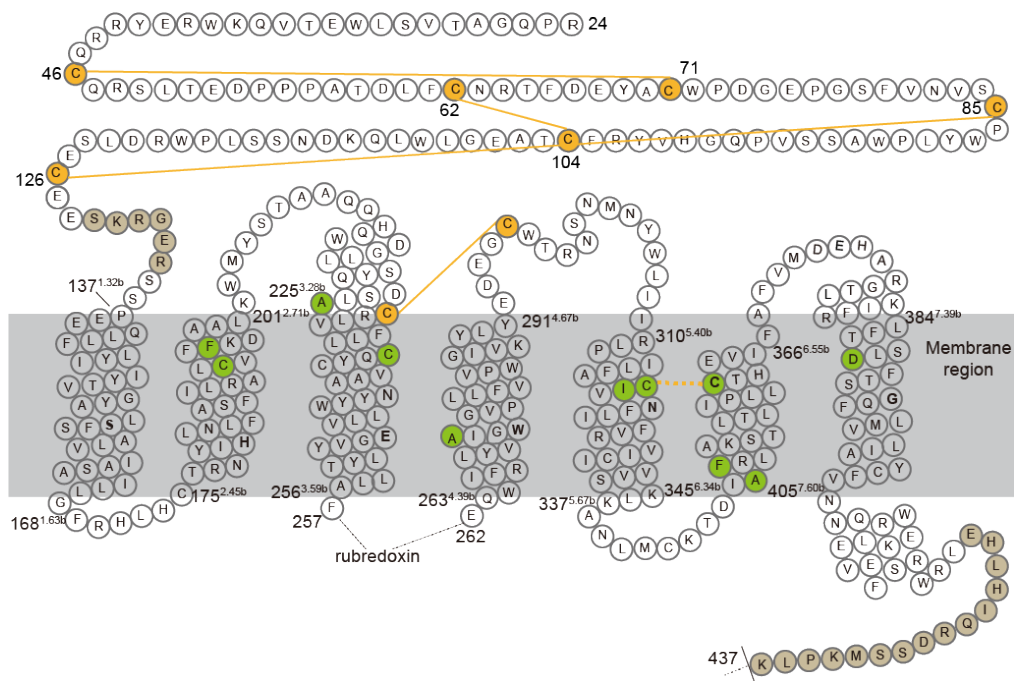

### Supplementary Fig. 1. Snake plot of the GLP-R construct used for crystallization.

Snake plot of the GLP-1R-rubredoxin fusion construct used for crystallization. Thermostabilizing mutations (green) are S193<sup>2.63b</sup>C, I196<sup>2.66b</sup>F, S225<sup>3.28b</sup>A, M233<sup>3.36b</sup>C, S271<sup>4.47b</sup>A, I317<sup>5.47b</sup>C, G318<sup>5.48b</sup>I, K346<sup>6.35b</sup>A, C347<sup>6.36b</sup>F, G361<sup>6.50b</sup>C, and E387<sup>7.42b</sup>D. The most conserved residue among class B GPCRs in each transmembrane helix are indicated in bold. Disordered residues in the structure are shown with brown background. The endogenous and engineered disulfide bonds are shown with solid and dashed orange lines, respectively.

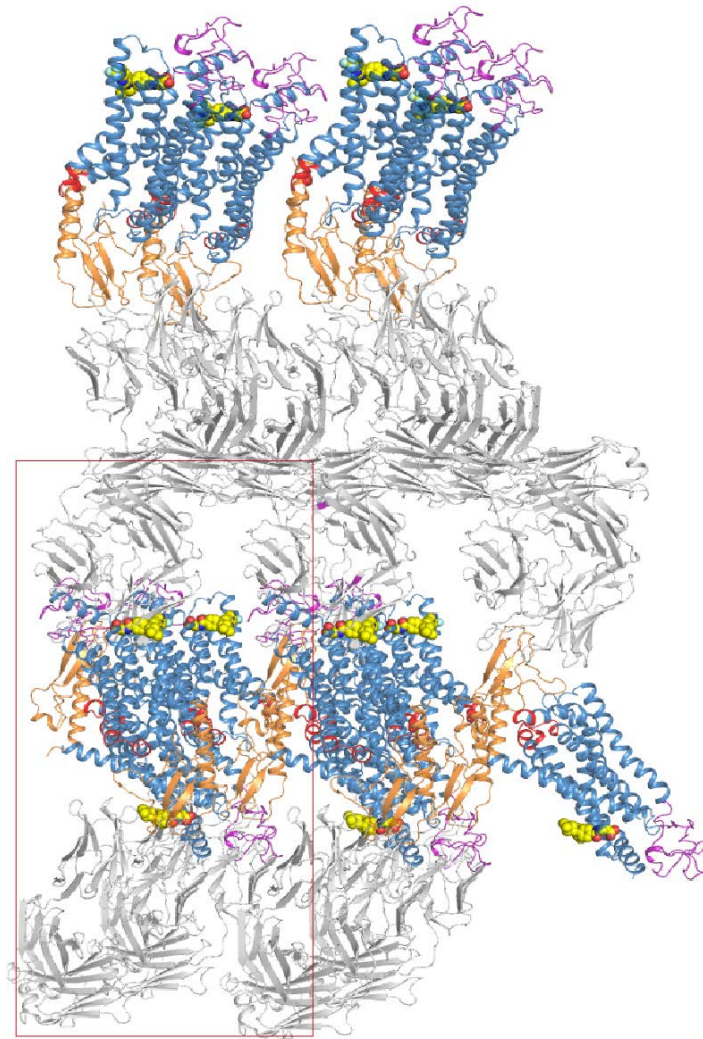

**Supplementary Fig. 2. Crystal packing of the GLP-1R–PF-06372222–Fab7F38 complex structure.** Fab7F38 is shown in cartoon representation (grey) with the receptor's ECD (orange), ECL1/3 (red) and TMD (blue). The fusion protein (rubredoxin) is in purple and PF-06372222 is displayed as spheres with yellow carbons. The unit cell is indicated by the red box.

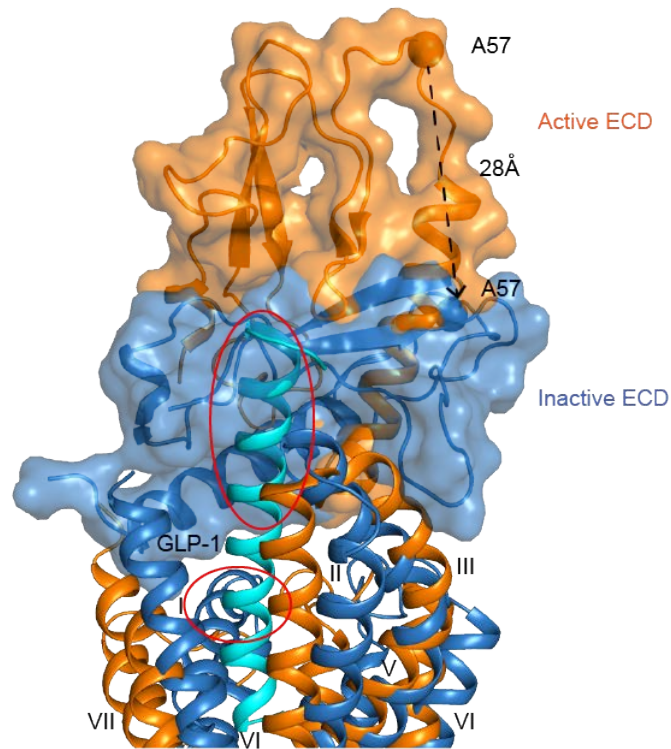

**Supplementary Fig. 3. Comparison between inactive GLP-1R crystal structure and active GLP-1R structure.** The inactive GLP-1R–Fab7F38 and active GLP-1R–GLP-1 complex structures are superimposed based on TMD alignment. The full-length inactive GLP-1R and active GLP-1R structures are shown as blue and orange, respectively. The ECDs are shown as surfaces and coloured as labelled. The GLP-1 in the active GLP-1R structure is shown in cyan. Red circles indicate where clashes occur when GLP-1 is docked into the inactive structure. The ECD path from the active to inactive conformation is highlighted with a black arrow showing movement of the landmark residue A57.

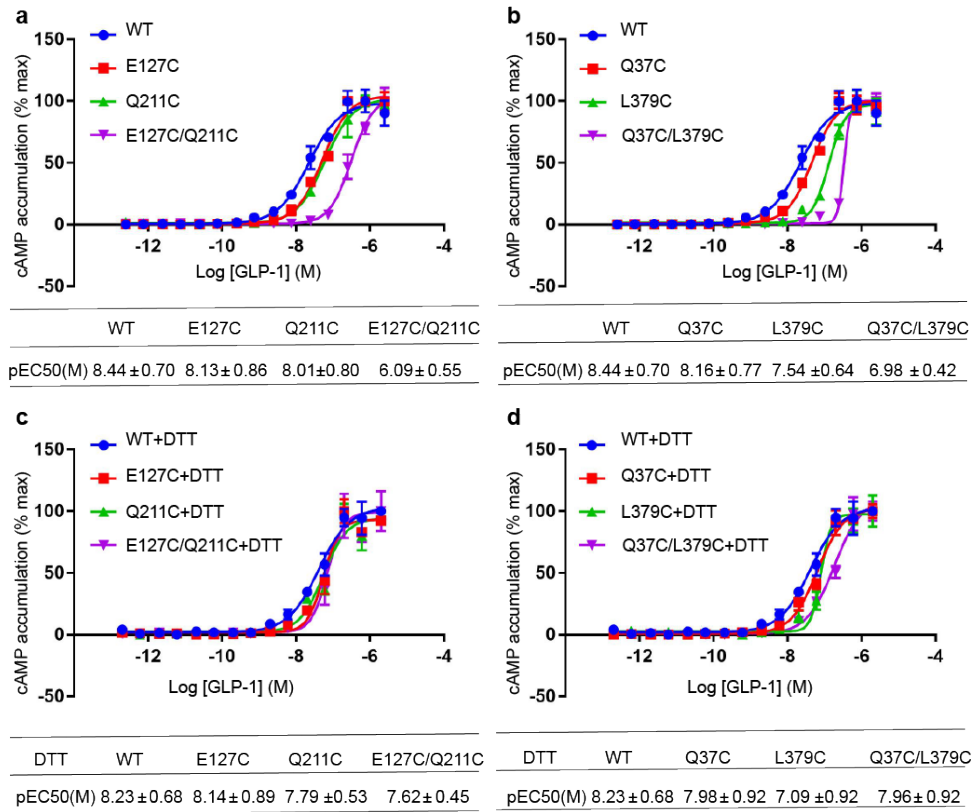

**Supplementary Fig. 4. GLP-1–induced cAMP accumulation assays.** GLP-1–induced cAMP accumulation measurements of wild-type, single point (E127C, Q211C, Q37C, L379C), and double point (E127/Q211C, Q37/L379C) mutants of GLP-1R in the absence (**a**, **b**) or presence (**c**, **d**) of 1 mM DTT. Dose–response curves of were generated from three independent experiments performed in duplicate. Data are shown as means ± s.e.m. Source data are provided as a Source data file.

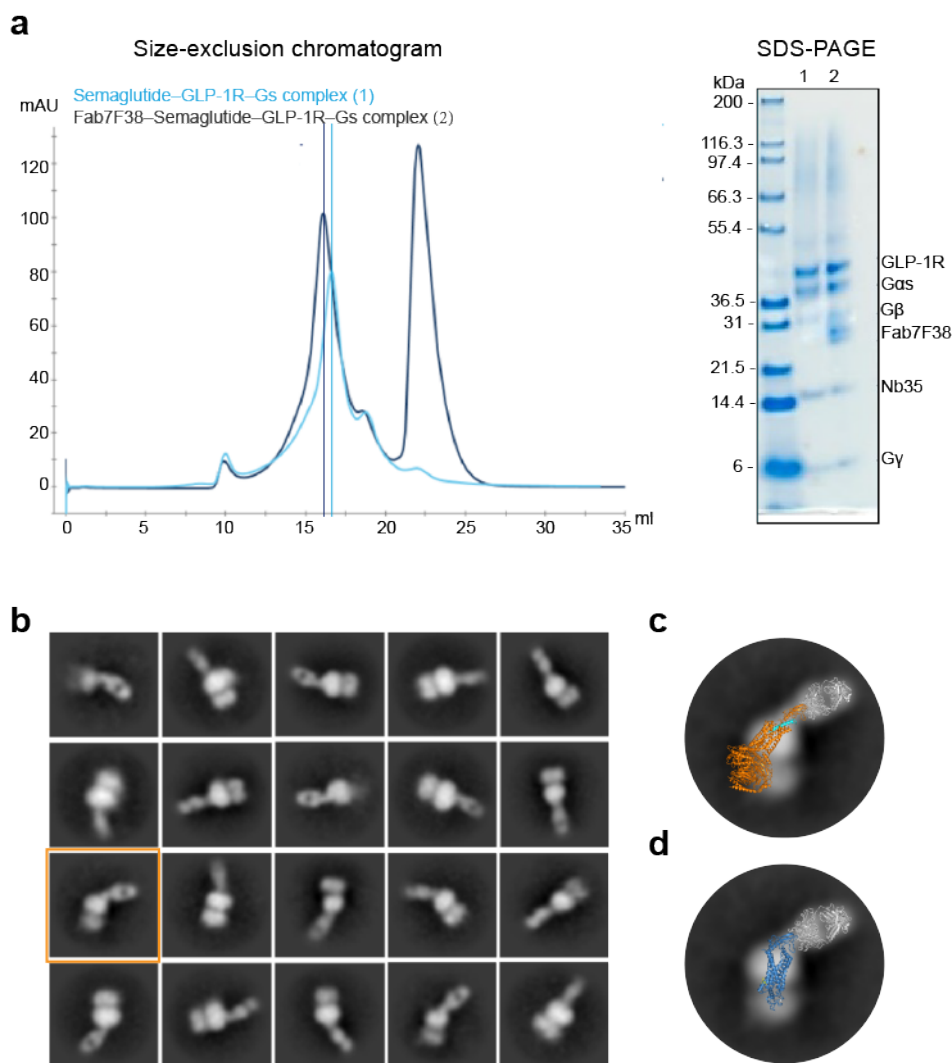

**Supplementary Fig. 5. Negative staining EM data of the Fab7F38–semaglutide–GLP-1R–Gs–Nb35 complex.**

**a** Size-exclusion chromatogram and SDS-PAGE of the semaglutide–GLP-1R–Gs–Nb35 complex with and without Fab7F38. **b** 2D class averages based on 9101 accepted particles. **c** Superposition of a model of the Fab7F38-bound GLP-1–GLP-1R–Gs complex on to 2D class average highlighted in **b**, illustrating the conformational discrepancies between the selected 2D class and the active-state model. Fab7F38 is shown in grey, GLP-1R–Gs in orange, and GLP-1 in cyan. **d** Fit of the inactive GLP-1R–Fab7F38 crystal structure in to the densities of the 2D class average highlighted in **b**. Fab7F38 and GLP-1R is depicted in grey and blue cartoon, respectively. The superpositions in **c** and **d** are guided by Fab7F38 and its density features. Source data is provided as a Source data file.



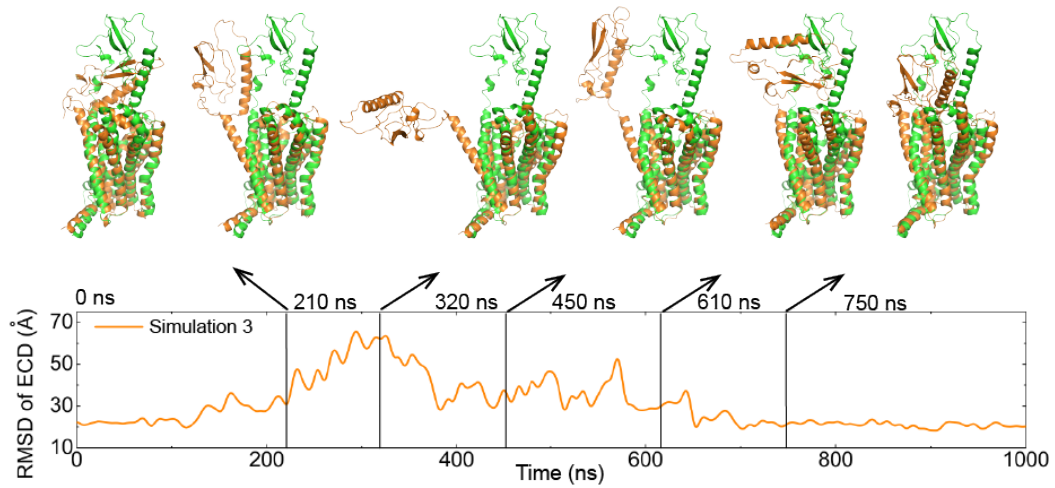

**Supplementary Fig. 6. Comparison of the third trajectory snapshots with the active GLP-1R-GLP-1 structure.** The full-length active GLP-1R structure (PDB: 5VAI) and the snapshots of trajectory 3 are shown as green and yellow cartoons, respectively. Main chain r.m.s.d. values of the ECD versus simulation time are shown for 1  $\mu$ s MD simulations, values are calculated from snapshots at 100 ps intervals.
