# Supplementary material for: Full-length human GLP-1 receptor structure without orthosteric ligands
Source: PubMed Central journal article supplement (PMC7062719; doi:10.1038/s41467-020-14934-5), 2020-03-09
Supplement: 41467_2020_14934_MOESM7_ESM.pdf [file 41467_2020_14934_MOESM7_ESM.pdf]

**Title:** Supplementary Movie 1.

**Description:** Molecular Dynamics (MD) simulation of the first trajectory (see Figure 5) reveals relatively stable mobility of the Extracellular Domain (ECD).

**Title:** Supplementary Movie 2.

**Description:** Molecular Dynamics (MD) simulation of the second trajectory (see Figure 5) reveals relatively stable mobility of the Extracellular Domain (ECD) similar to the first trajectory.

**Title:** Supplementary Movie 3.

**Description:** Molecular Dynamics (MD) simulation of the third trajectory (see Figure 5) reveals relatively large mobility of the Extracellular Domain (ECD).
